# Supplementary material for: Deficiency of a triterpene pathway results in humidity-sensitive genic male sterility in rice
Source: PubMed Central journal article supplement (PMC5807508; doi:10.1038/s41467-018-03048-8), 2018-02-09
Supplement: 41467_2018_3048_MOESM1_ESM.pdf [file 41467_2018_3048_MOESM1_ESM.pdf]

1

## **Supplementary Information**

2 **Deficiency of a triterpene pathway results in humidity-sensitive genic**

3 **male sterility in rice**

4

5 *By Xue et al.*

6

7 **Supplementary Figures:**

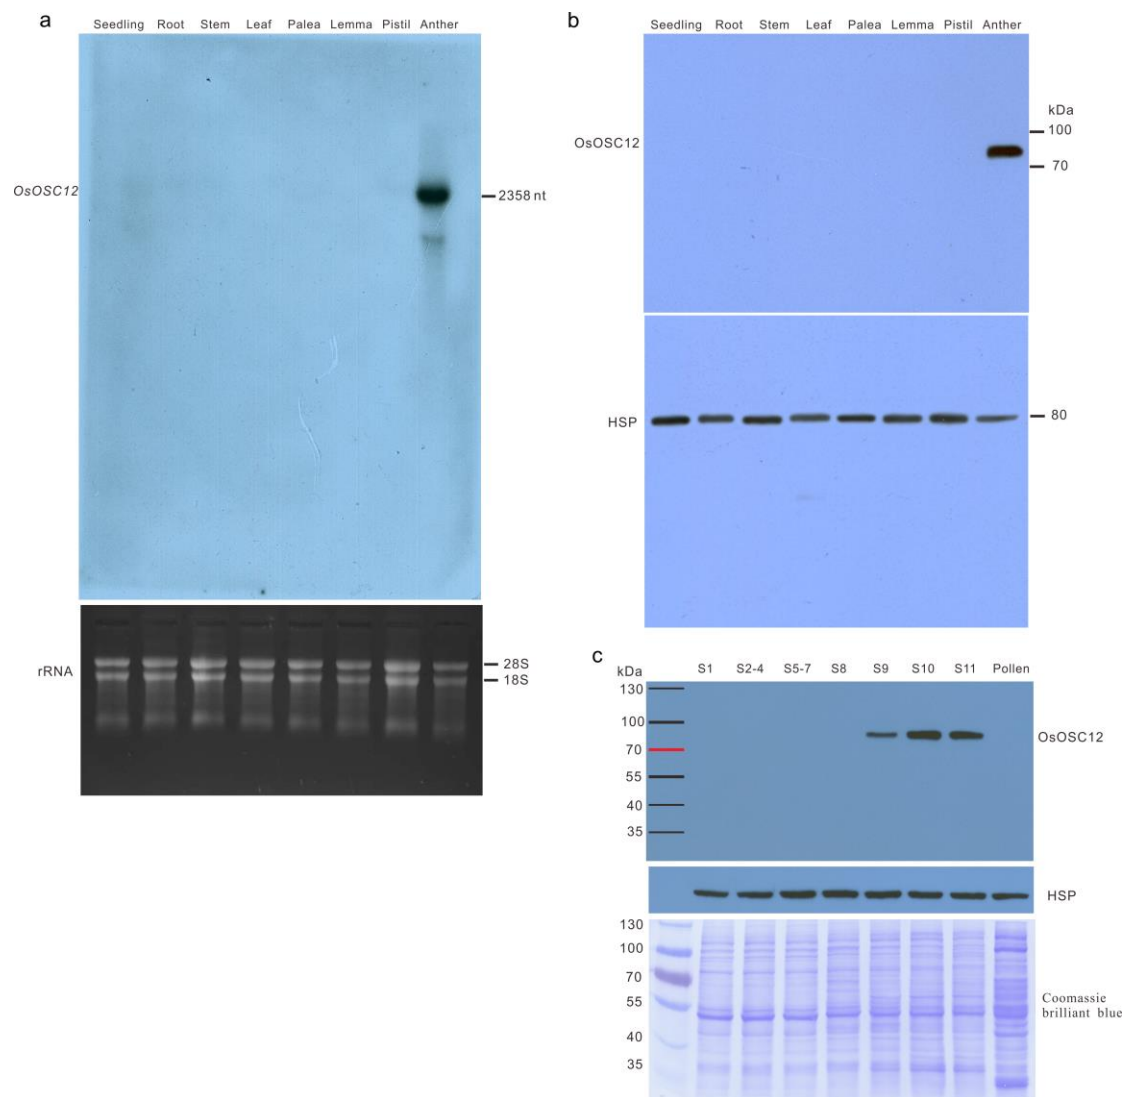

8

9 **Supplementary Figure 1 | Transcription and expression of *OsOSC12*.** (a, b) Tissue  
 10 specificity as revealed by Northern and Western blotting. (c) Temporal profiles during  
 11 anther development, as shown by Western blotting. S1 to S11 correspond to the stages  
 12 of anther development as described in main text. The negative controls for Northern  
 13 and Western blotting experiments were, respectively, 18S and 28S rRNA, and the rice  
 14 heat shock protein Q69QQ6 and SDS-PAGE gel stained by coomassie brilliant blue.

15

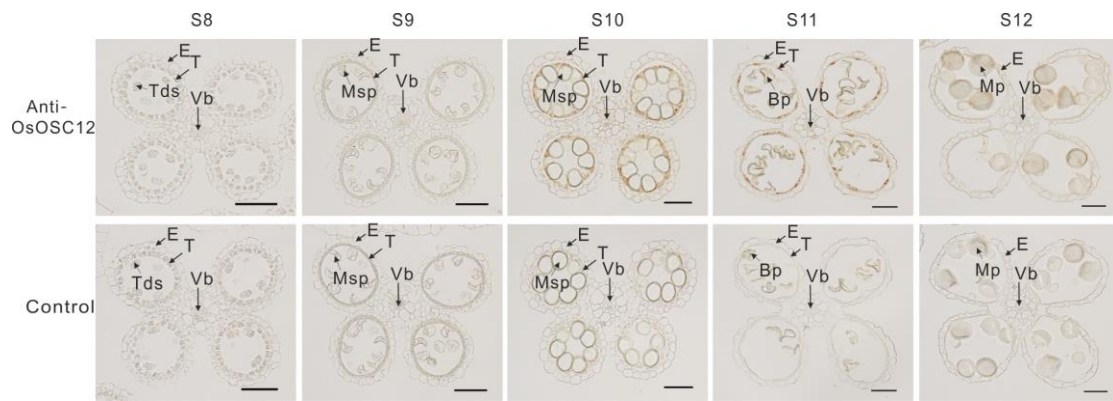

16

17 **Supplementary Figure 2 | Expression pattern of OsOSC12 as revealed by**  
 18 **immunolocalization.** OsOSC12 accumulated from S9 in the tapetum and vascular  
 19 bundle, and declined during S11 and S12 (the negative control contained only  
 20 blocking buffer). Bp, bicellular pollen; E, epidermis; Mp, mature pollen; Msp,  
 21 microspore; T, tapetum; Tds, tetrads; Vb, vascular bundle. Scale bar, 50  $\mu$ m.

22

23

24

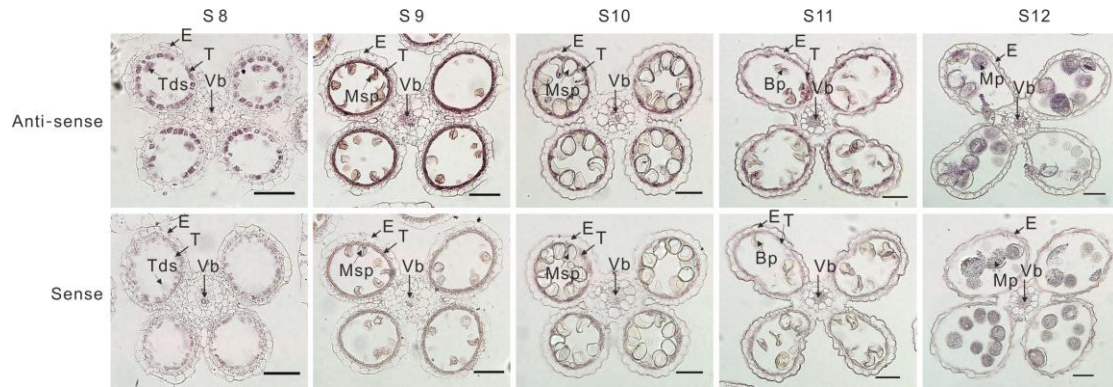

25

26 **Supplementary Figure 3 | *In situ* mRNA analysis of *OsOSC12* transcript.** A low  
 27 abundance of transcript was present in the tapetum and tetrads at S8, after which the  
 28 level rose until its decline during S10 and S11, falling below the level of detection by  
 29 S12. The *OsOSC12* sense probe was used as the negative control. Bp, bicellular  
 30 pollen; E, epidermis; Mp, mature pollen; Msp, microspore; T, tapetum; Tds, tetrads;  
 31 Vb, vascular bundle. Scale bar, 50  $\mu$ m.

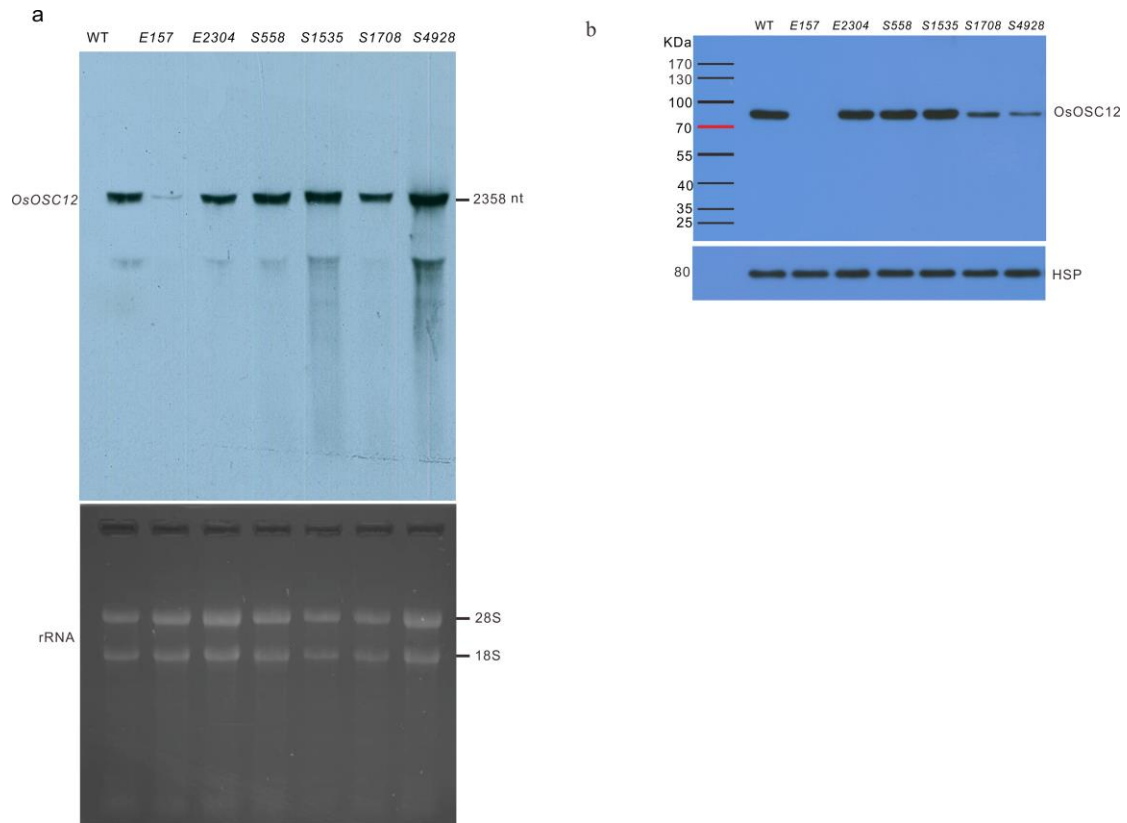

32

33 **Supplementary Figure 4 | Transcription and expression of *OsOSC12* in mutants.**

34 (a) Northern blot analysis of *OsOSC12* transcription. (b) Western blot analysis of

35 *OsOSC12* expression. The negative controls for Northern and Western blotting

36 experiments were, respectively, 18S and 28S rRNA, and the rice heat shot protein

37 Q69QQ6.

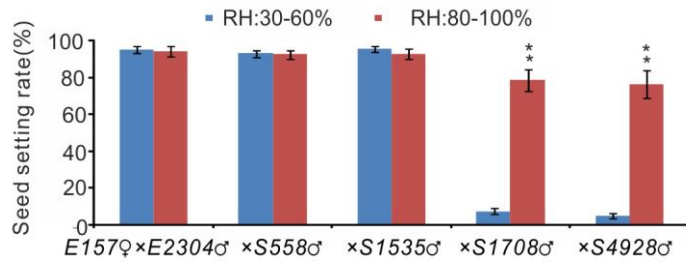

38

39 **Supplementary Figure 5 | Seed setting of F<sub>1</sub> plants from crosses of *E157* with**  
 40 **other mutants at the normal (30-60%) and high (80-100%) RH.** The data are  
 41 presented as means ± s.d., *n* = 15. \*\**P* < 0.01, Student's *t* tests. Both the *E157* x  
 42 *S1708* and *E157* x *S4928* F<sub>1</sub> hybrids were male sterile, while those derived from  
 43 crosses of *E157* with each of the other three *OsOSC12* mutants were all male fertile.

44

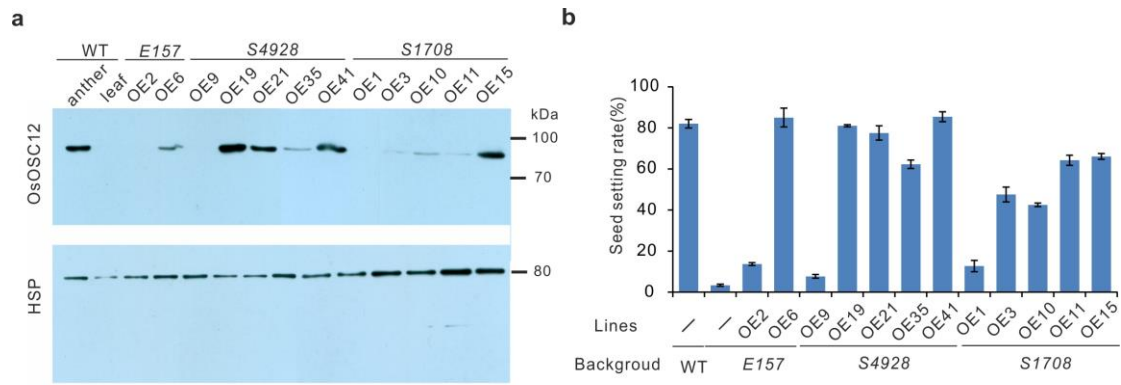

45

46 **Supplementary Figure 6 | Complementary experiment of *OsOSC12*.** (a) Western  
 47 blotting shows the protein level of *OsOSC12* (top-panel) in the WT and in the leaf  
 48 of twelve independent T<sub>0</sub> transgenic lines of *E157*, *S4928* and *S1708*. The rice heat  
 49 shock protein Q69QQ6 is used as negative control (lower-panel) (b) Seed setting of  
 50 the twelve T<sub>0</sub> lines of *E157*, *S4928* and *S1708* mutants at normal (30-60%) RH. The  
 51 data are presented as means  $\pm$  s.d.,  $n = 6$ . The *OsOSC12* over-expression construct  
 52 was driven by ubiquitin promoter.

53

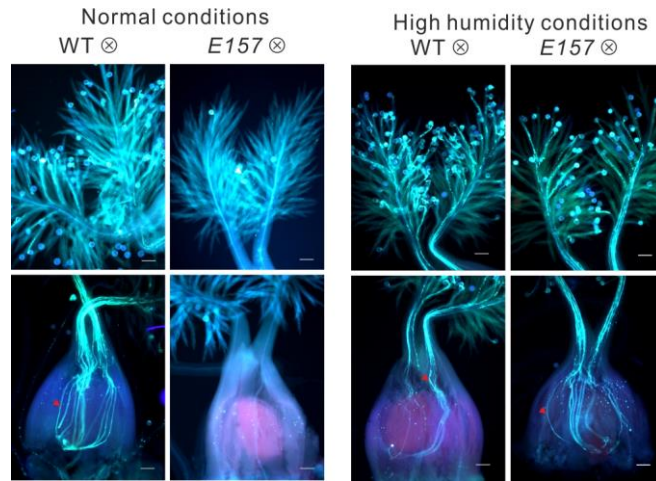

54

55 **Supplementary Figure 7 | Pollen germination under different RH.** *In vivo* pollen  
 56 germination (upper panels) and pollen tube elongation (lower panels) of WT and  
 57 *E157* pollen exposed to an RH of normal (30-60% RH), and high humidity (80-100%  
 58 RH) conditions. Images were taken 1 h after pollination. Scale bar, 100  $\mu$ m.

59



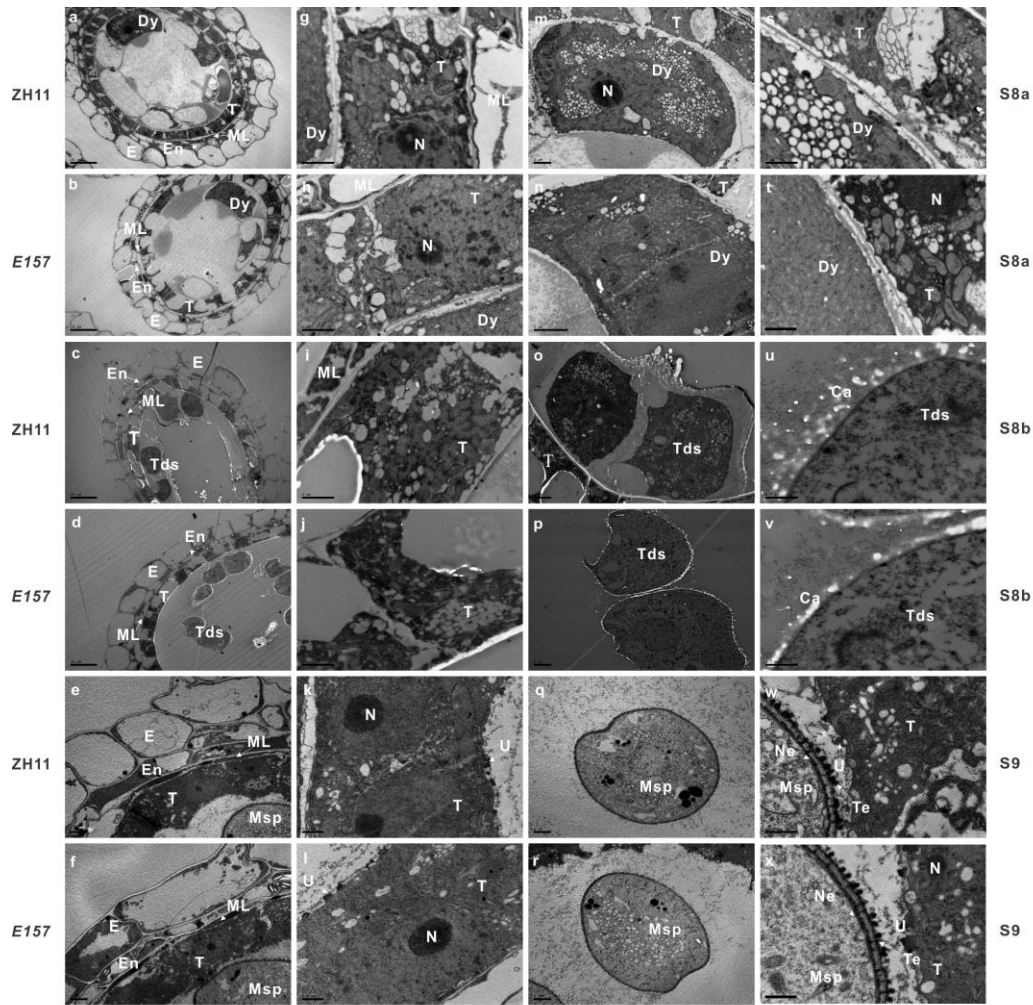

60

61 **Supplementary Figure 8 | TEM analysis of the development of tapetum (a-l) and**  
 62 **pollen wall (m-x) over the period S8-S9. Tapetum of wild-type ZH11: a, c, e, g, i, k;**  
 63 **Tapetum of *E157* mutant: b, d, f, h, j, l; Pollen wall of wild-type ZH11: m, o, q, s, u,**  
 64 **w; Pollen wall of *E157* mutant: n, p, r, t, v, x. Ca, callose wall; Dy, dyad; E, epidermis**  
 65 **En, endothecium; ML, middle layer; Msp, microspore; N, nucleus; Ne, nexine; T,**  
 66 **tapetum; Tds, Tetrads; Te, tectum; U, ubisch bodies. Scale bar for a-d, 10  $\mu$ m, for e, f,**  
 67 **m-r, 2  $\mu$ m, for g-j, s, t, 1  $\mu$ m, for k, l, u-x, 0.5  $\mu$ m.**

68

69

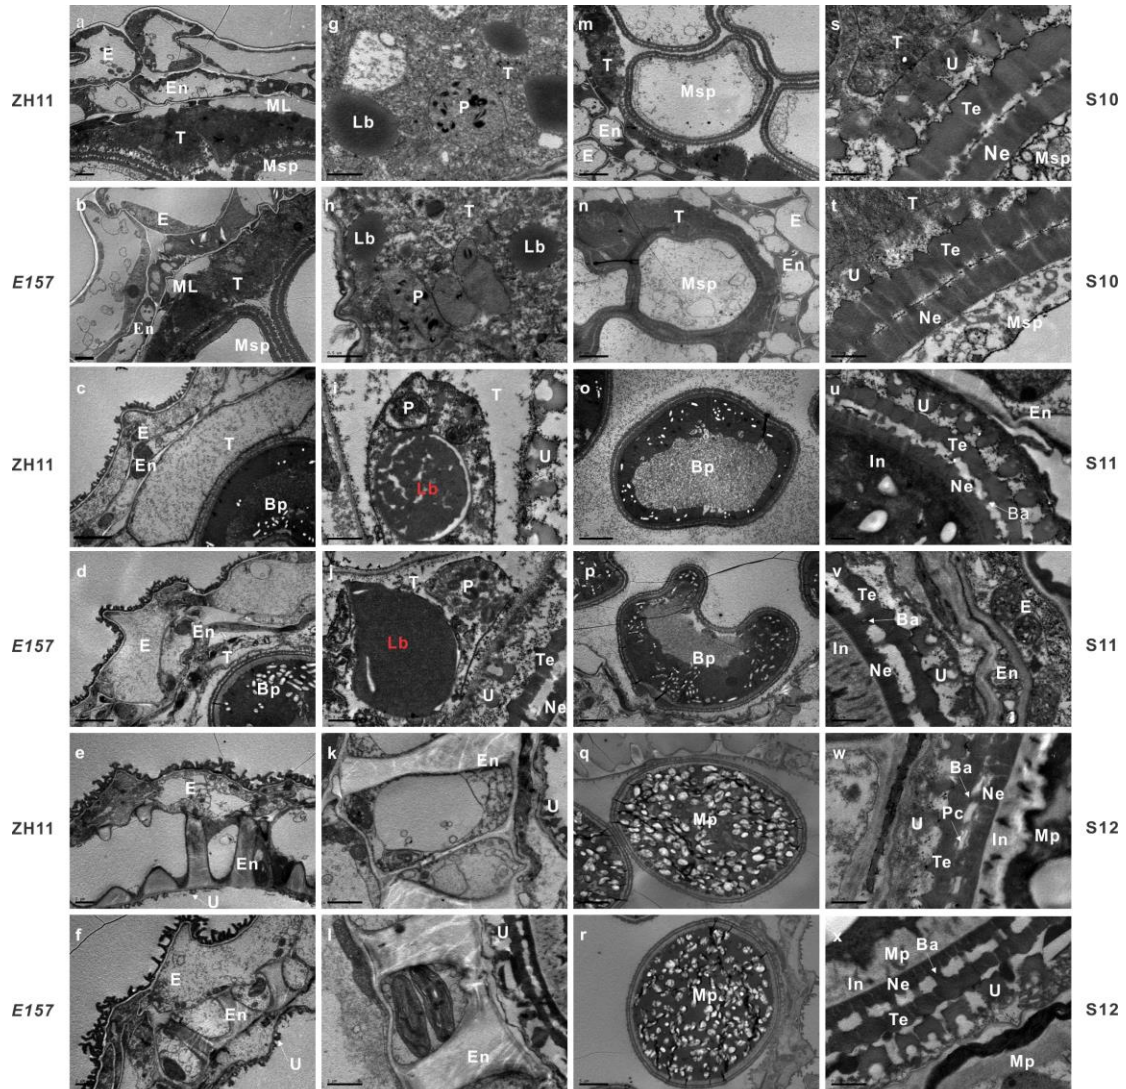

70

71 **Supplementary Figure 9 | TEM analysis of the development of tapetum (a-l) and**

72 **pollen wall (m-x) over the period S10-S12. Lipid body (Lb, in red font) is more**

73 **intact in mutants *E157* than that in WT plants. The Tapetum of wild-type ZH11: a, c,**

74 **e, g, i, k; Tapetum of *E157* mutant: b, d, f, h, j, l; Pollen wall of wild-type ZH11: m, o,**

75 **q, s, u, w; Pollen wall of *E157* mutant: n, p, r, t, v, x. Ba, bacula; Bp, bicellular pollen;**

76 **E, epidermis; En, endothecium; In, intine; Lb, lipid body; ML, middle layer; Msp,**

77 **microspore; Mp, mature pollen; Ne, nexine; P, plastid; Pc, pollen coat; T, tapetum; Te,**

78 **tectum; U, ubisch bodies. Scale bar for a, b, e, f, 2  $\mu$ m, for c, d, m-r, 5  $\mu$ m, for g-j, s-x,**

79 **0.5  $\mu$ m, for k, l, 1  $\mu$ m.**

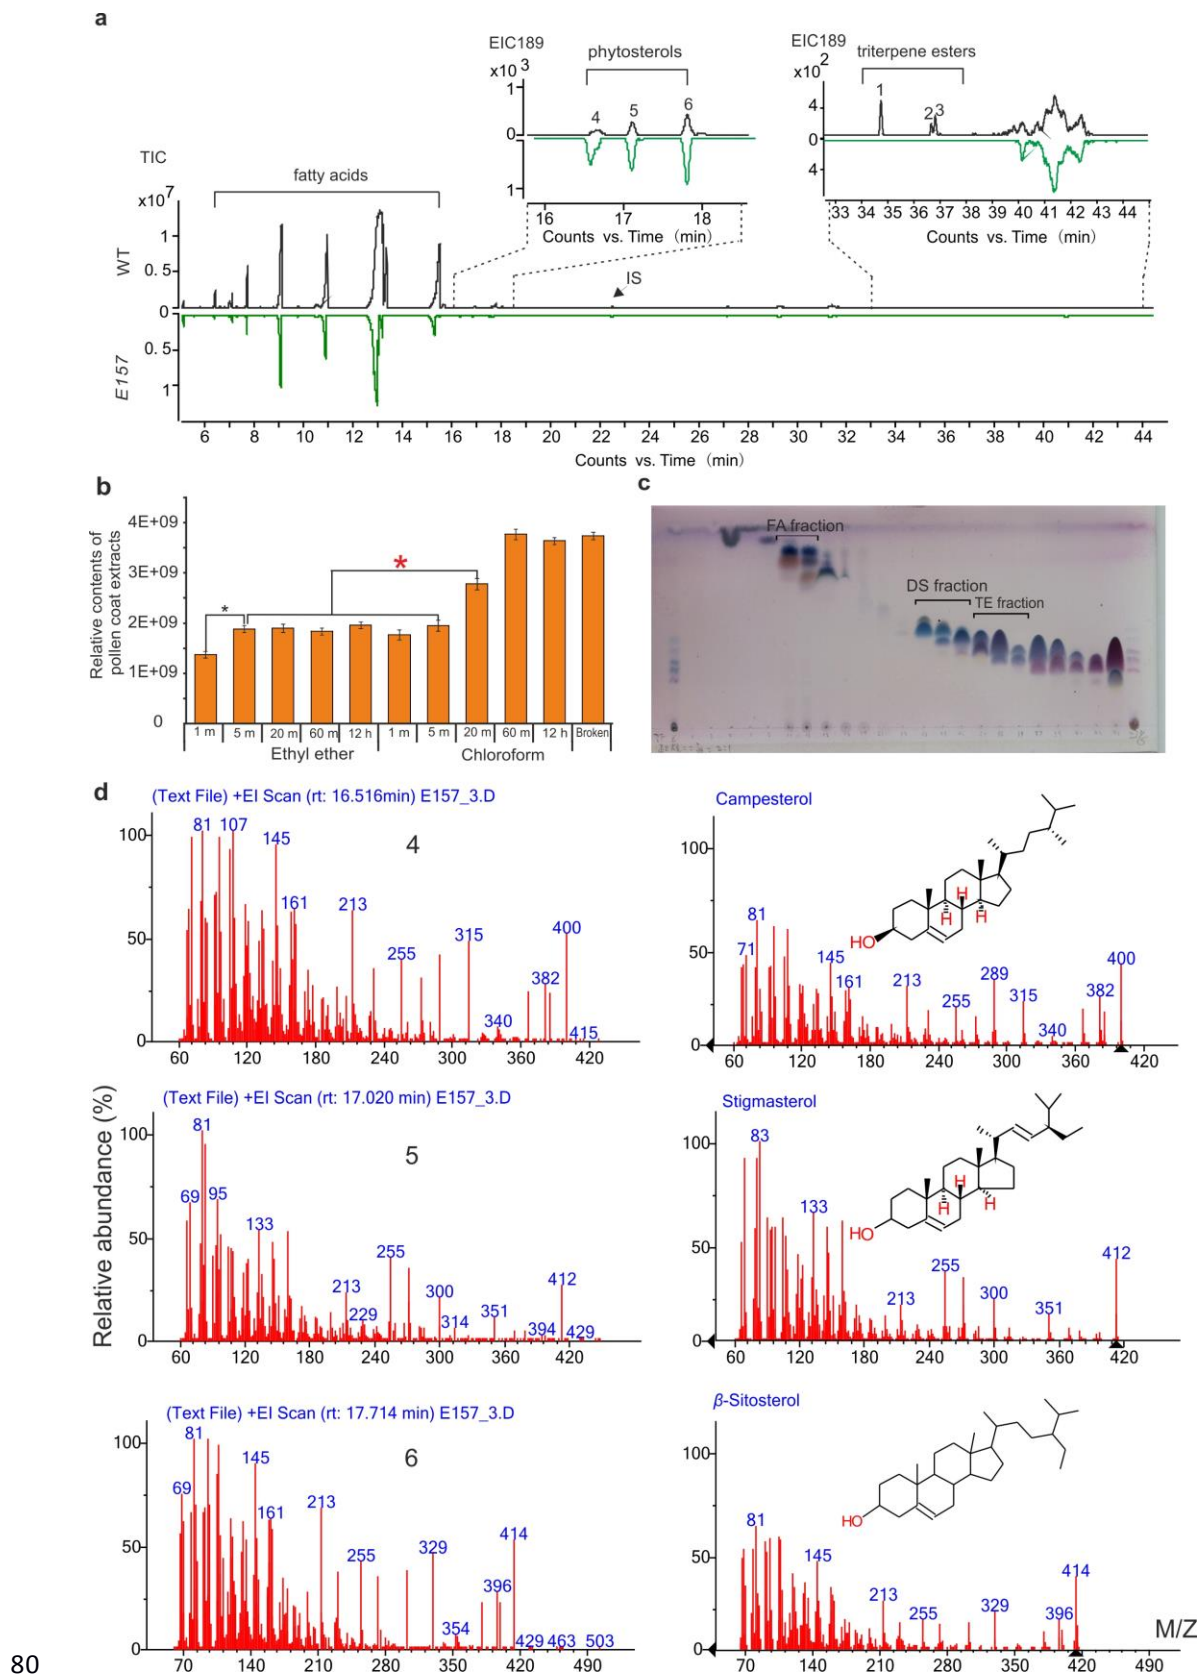

81 **Supplementary Figure 10 | Method for pollen coat extraction and fractions of**  
 82 **pollen coat extracts. (a) GC-MS profile of the ethyl ether extracts of pollen coat**



83 from *E157* and WT plants. 1: poaceatapol palmitic acid (16:0) ester; 2:  
84 poaceatapol oleic acid (18:1) ester; 3: poaceatapol stearic acid (18:0) ester; 4:  
85 campesterol; 5: stigmasterol; 6:  $\beta$ -sitosterol; IS: internal standard (betulin). Mass  
86 spectra of poaceatapol esters were shown in Supplementary Figure 14. TIC, total ion  
87 chromatogram; EIC189, extracted ion chromatograms at  $m/z$  189. **(b)** Amount of  
88 pollen coat extracts (PCE) by different solvents and extracting times. The amount was  
89 based on total GC-MS peak areas. The data are presented as means  $\pm$  s.d.,  $n = 5$ . The  
90 black asterisk indicates a significant difference ( $P < 0.05$  by Student's *t*-test) between  
91 amounts of PCE for 1 min and 5 min ethyl ether extraction, indicating extraction of  
92 pollen coat material is incomplete by treatment in ethyl ether for 1 min. The red  
93 asterisk indicates significant different PCE amounts ( $P < 0.05$  by Student's *t*-test)  
94 between both ethyl ether extractions (5 min to 12 h) and chloroform extractions for  
95 more than 20 min, also between 1 to 5 min and more than 20 min chloroform  
96 extractions. The PCE amounts from chloroform extractions more than 60 min do not  
97 differ from the extraction of broken pollen grains ( $P > 0.05$  by Student's *t*-test). These  
98 results indicated that extractions by ethyl ether for more than 5 min or chloroform less  
99 than 5 minutes will specifically extract the pollen coat materials. **(c)** TLC analysis  
100 (hexane: dichloromethane = 2:1) of fractions obtained from silica column separations.  
101 About 200 g pollen grains were extracted by using ethyl ether for 20 min. The silica  
102 column was eluted by a gradient eluents system, and 20 g silica was used. FA fraction:  
103 fraction including fatty acids; DS fraction: fraction including dehydrated sterols; TE  
104 fraction: fraction including triterpene esters. **(d)** Mass spectra of three phytosterols  
105 from mutant *E157* (left) and commercial standards (right). 4: campesterol; 5:  
106 stigmasterol; 6:  $\beta$ -sitosterol.

107

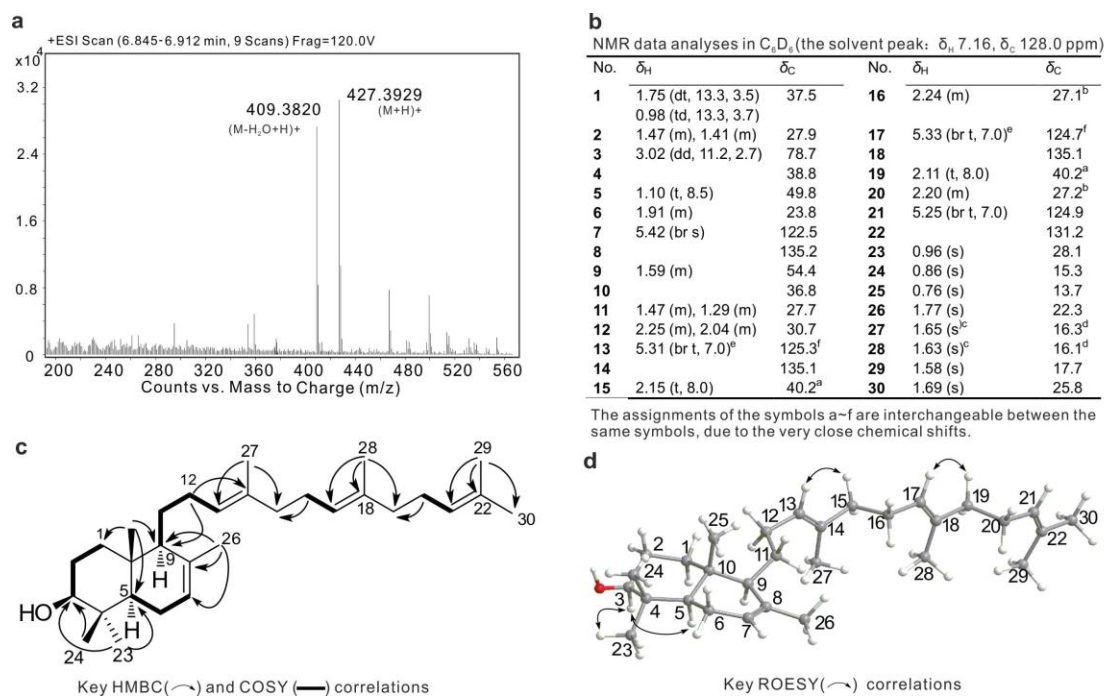

108

109 **Supplementary Figure 11 | The structural identification of OsOSC12 product. (a)**

110 Mass spectrum of OsOSC12 product as derived from Agilent 6540 Quadrupole

111 time-of-flight mass spectrometry. The positive electrospray ionization (ESI) mode

112 was used. (b) The assignments of <sup>1</sup>H and <sup>13</sup>C NMR data of OsOSC12 product,

113 poaceatapetol (polypoda-7,13*E*,17*E*,21-tetraene-3β-ol). The full assignments and

114 connectivity were determined by <sup>1</sup>H-<sup>1</sup>H COSY, ROESY, HSQC, and HMBC spectra

115 (Supplementary Data 1). (c) Key correlations of HMBC and COSY. (d) Key

116 corrections of ROESY.

117

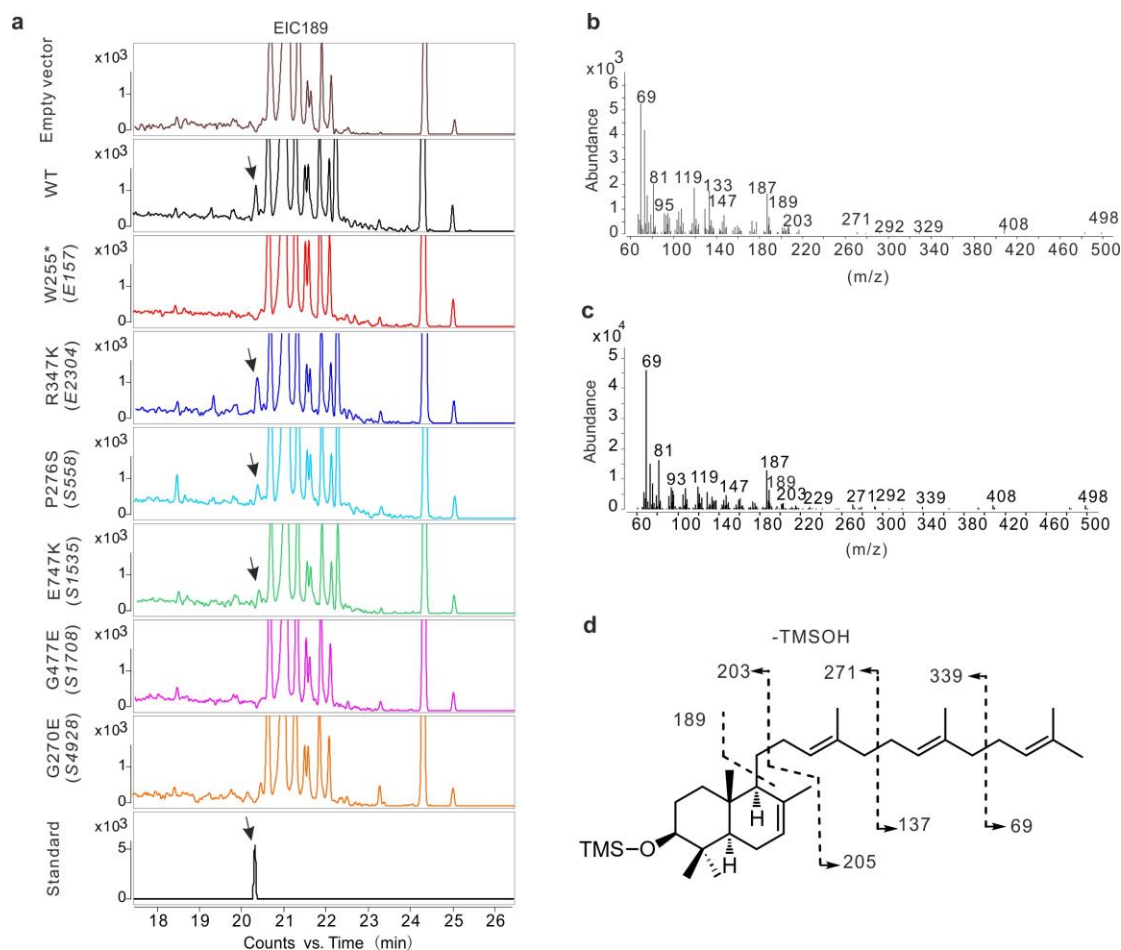

118

119 **Supplementary Figure 12 | Functional analysis of OsOSC12 in *Pichia pastoris*.** (a)

120 GC-MS profiles of extracts from *Pichia pastoris* strains heterologously expressing

121 wild-type and mutants' OsOSC12 proteins. The WT protein was deduced from

122 synthetic gene *SnOsOSC12* (Supplementary Data 3) with yeast preferred codon usage.

123 All mutants were generated by PCR based site-directed mutagenesis. The arrow

124 indicated the peak of OsOSC12 product. Standard, purified poaceatpetol; EIC189,

125 extracted ion chromatograms at  $m/z$  189. (b) Mass spectrum of trimethylsilyl

126 derivatives of the OsOSC12 product extracted from *Pichia pastoris*. (c) Mass

127 spectrum of poaceatpetol standard purified from rice panicles. (d) The proposed

128 fragmentation of trimethylsilyl (TMS) derivative of poaceatpetol.

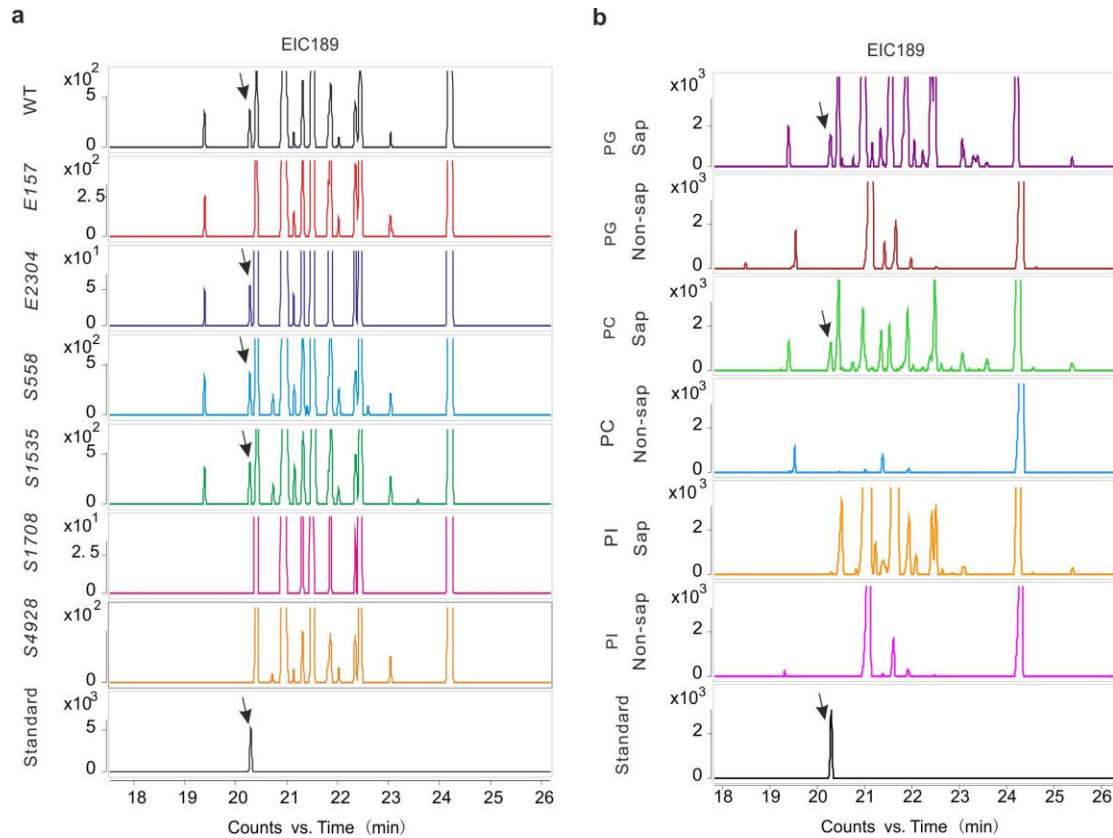

129

130 **Supplementary Figure 13 | Identification of poaceatapelol derivatives in pollen**  
 131 **coat.** (a) GC-MS profiles of the triterpene alcohols of pollen extractions from  
 132 *OsOSCI2* mutants and WT plants. (b) GC-MS profiles of the triterpene alcohols from  
 133 extracts of non-saponified (Non-sap) and saponified (Sap) pollen grains (PG), pollen  
 134 coat (PC), and pollen inside (PI) of WT plants. The arrow indicates the poaceatapelol  
 135 peak. Standard, purified poaceatapelol; EIC189, extracted ion chromatograms at  $m/z$   
 136 189. Poaceatapelol was identified in the saponified WT pollen grains and pollen coat  
 137 materials, but it is not detected in the non-saponified samples of the WT pollen grains  
 138 and pollen inside materials. Saponification treatment generates free alcohols and  
 139 triterpenes from modified triterpenoids.

140

141

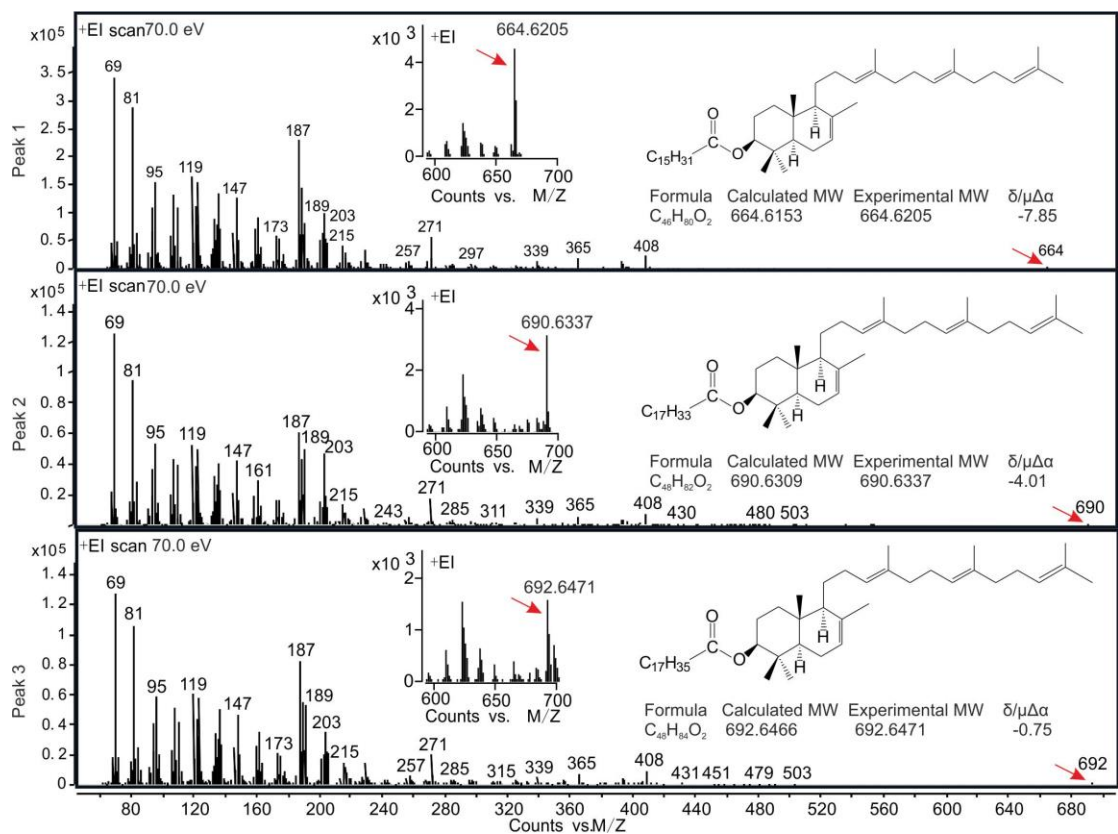

142

143 **Supplementary Figure 14 | The mass spectra and predicted structures of**  
 144 **poaceatpetol fatty acid esters.** GC-MS analysis revealed three peaks 1, 2, and 3  
 145 (the region of triterpene esters in Supplementary Fig. 10) from the WT pollen coat  
 146 sample. The mass spectrum of each poaceatpetol fatty acid ester is zoomed in to  
 147 show its molecular ion (see red arrows). Samples were analyzed by using Agilent  
 148 7200A GC/Q-TOF with an electron ionization of 70 eV. High resolution mass analysis  
 149 suggested that these three peaks are C16:0, C18:1 and C18:0 fatty acid esters of  
 150 poaceatpetol.

151

152



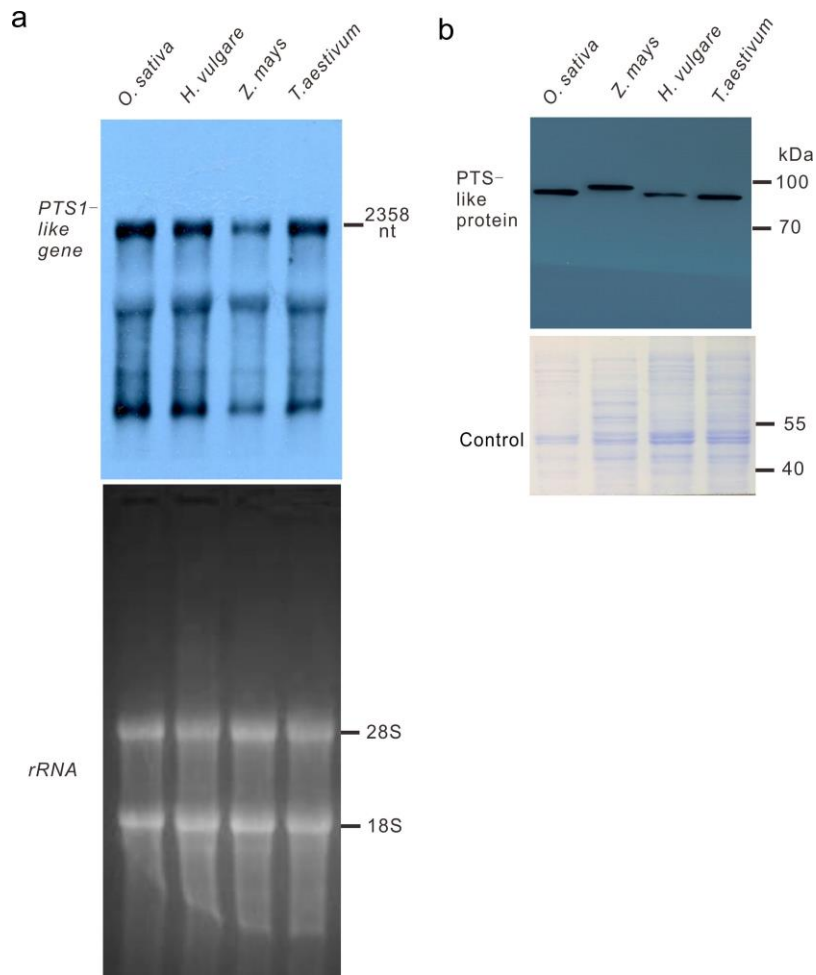

153

154 **Supplementary Figure 15 | Transcription and expression of *OsOSC12*-like genes.**

155 (a) Northern blotting analysis of transcription in the anthers of four major cereal  
 156 species. (b) Western blotting demonstrates the presence of *OsOSC12*-like proteins in  
 157 the anthers of other cereal species. The negative controls for Northern and Western  
 158 blotting experiments were, respectively, 18S and 28S rRNA, and SDS-PAGE gel  
 159 stained by coomassie brilliant blue.

160

161

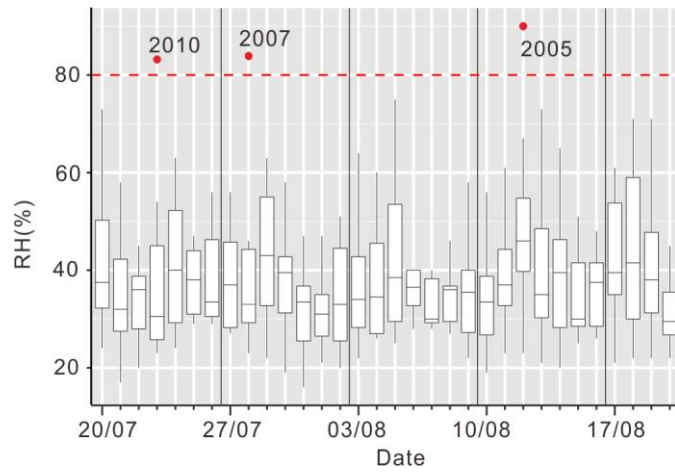

162

163 **Supplementary Figure 16 | Box plot for the day average RH around rice anthesis**  
164 **period (July 20th to August 17th) in Urumqi city, Xinjiang China (from**  
165 **2005-2014).** Data were provided by the Xinjiang Uygur Autonomous Region  
166 Meteorological Information Centre.

167

**Supplementary Table 1. EMS\* and SAZ<sup>†</sup> induced mutations in *OsOSC12*.**

| Mutant       | Mutation event | Position | Predicted amino acid change | Population |
|--------------|----------------|----------|-----------------------------|------------|
| <i>E248</i>  | A -> G         | Intron 9 | -                           | EMS        |
| <i>S1708</i> | G -> A         | Exon 10  | G <sup>1430</sup> -> E      | SAZ        |
| <i>E572</i>  | A -> G         | Intron9  | -                           | EMS        |
| <i>S4312</i> | C -> T         | Intron17 | -                           | SAZ        |
| <i>S1535</i> | G -> A         | Exon18   | E <sup>2239</sup> -> K      | SAZ        |
| <i>S558</i>  | C -> T         | Exon6    | P <sup>826</sup> -> S       | SAZ        |
| <i>S134</i>  | G -> A         | Intron6  | -                           | SAZ        |
| <i>S4888</i> | G -> A         | Intron6  | -                           | SAZ        |
| <i>E2304</i> | G -> A         | Exon7    | R <sup>1031</sup> -> K      | EMS        |
| <i>E157</i>  | G -> A         | Exon6    | W <sup>764</sup> -> stop    | EMS        |
| <i>E997</i>  | A -> G         | Intron6  | -                           | EMS        |
| <i>E1501</i> | C -> T         | Exon7    | L <sup>961</sup> -> L       | EMS        |
| <i>S4175</i> | G -> A         | Intron6  | -                           | SAZ        |
| <i>S4928</i> | G -> A         | Exon6    | G <sup>809</sup> -> E       | SAZ        |

168 \*EMS and <sup>†</sup>SAZ represent the ethylmethylsulfone and sodium azide.

169 **Supplementary Table 2. Genetics analysis of *OsOSC12* mutants.**

| BC <sub>3</sub> F <sub>2</sub> | Total | Fertility | Sterility | Ratio  | $\chi^2$ (3:1) | <i>P</i> value |
|--------------------------------|-------|-----------|-----------|--------|----------------|----------------|
| E157♀ × WT ♂                   | 366   | 276       | 90        | 3.07:1 | 0.033          | >0.05          |
| S1708♀ × WT ♂                  | 172   | 132       | 40        | 3.3:1  | 0.279          | >0.05          |
| S4928♀ × WT ♂                  | 190   | 143       | 47        | 3.04:1 | 0.007          | >0.05          |

170 Note: F<sub>1</sub> hybrids from crosses between the three male sterile mutants (*E157*, *S1708*  
 171 and *S4928*) and the WT appeared morphologically normal and were fully self-fertile.  
 172 The F<sub>2</sub> progeny of each cross segregated consistently in the ratio of three fertile to one  
 173 sterile.

174

175

**Supplementary Table 3. Sequences of oligonucleotide primers used.**

| Name        | Sequence (5'-3')                                   |
|-------------|----------------------------------------------------|
| OSCA8_1     | TCCCAGGCCCACTGTTTACC                               |
| OSCA8_2     | GCCATCTTCGCCAACCCAT                                |
| OSACT_1     | TCCATCTTGGCATCTCTCAG                               |
| OSACT_2     | GTACCCGCATCAGGCATCTG                               |
| EX6-8_1     | GAGGTCAAGTCGTCTTCTGCAATTA                          |
| EX6-8_2     | ATTTGTCTGCGCTCTGCACATG                             |
| EX8-10_1    | GCTTAAAGGTAAATTTTCAGGCTTCC                         |
| EX8-10_2    | CGATCAGAATCAATTAACCCAGAC                           |
| EX16-18_1   | TCATCCTTAGATTAATTAGCCGACA                          |
| EX16-18_2   | CATAAGGATCTCATAAAATCGACCA                          |
| OSC8S       | ATGTGGAAGCTCAAGATTGCCGAG                           |
| OSC8A       | TCAAGTTGGCGCTGTTGTACTTGC                           |
| ANTISENSE_1 | TCCCAGGCCCACTGTTTACC                               |
| ANTISENSE_2 | TAATACGACTCACTATAGGGGGTCATGTATCCATTTTCTTGC         |
| SENSE_1     | TAATACGACTCACTATAGGGTCCCAGGCCCACTGTTTACC           |
| SENSE_2     | GGTCATGTATCCATTTTCTTGC                             |
| E157-Mu_1   | CAACCAGGACGACTT <u>T</u> AGAGTCACTTCCGAATG         |
| E157-Mu_2   | CATTCGGAAGTGACTC <u>T</u> AAAGTCGTCCTGGTTG         |
| E2304-Mu_1  | ATTAGTTACATGAGAAAA <u>A</u> AGGCTCTATACCAAATTGCTG  |
| E2304-Mu_2  | CAGCAATTTGGTATAGAGC <u>C</u> TTTTTCTCATGTAACAAAT   |
| S558-Mu_1   | GGTAAAAAGTTTGTTCGGT <u>T</u> CTATTACAAGATTGGTTA    |
| S558-Mu_2   | TAACCAATCTTGTAAT <u>A</u> GAAACCGACAAACTTTTTACC    |
| S1535-Mu_1  | CCCTATATGGGCTCTTGGA <u>A</u> AGTACCA GAAATTA GTATT |
| S1535-Mu_2  | AATACTAATTTCTGGTACTTTCCAAGAGCCCATATAGGG            |
| S1708-Mu_1  | TCAGGTTGCCGATCAAG <u>A</u> ATGGCAGGTTTCA GATTG     |
| S1708-Mu_2  | CAATCTGAAACCTGCCAT <u>T</u> CTTGATCGGCAACCTGA      |
| S4928-Mu_1  | CCATGTCTTACTTGTAT <u>G</u> AGAAAAAGTTTGTTCGGTCCT   |
| S4928-Mu_2  | AGGACCGACAAACTTTTT <u>C</u> TATACAAGTAAGACATGG     |

177 The bases with underline are the mutation sites for each mutant.

178

179

180 **Supplementary Table 4. The treatments in exogenous application experiments.**

| Abbreviated names | The components and concentration of solution* for exogenous application treatments |
|-------------------|------------------------------------------------------------------------------------|
| E157-mock         | -                                                                                  |
| WT-mock           | -                                                                                  |
| 1/4 WT            | 1/4 dilution PCE from 5g WT pollen grains (50 mg mL <sup>-1</sup> )                |
| 1/5 WT            | 1/5 dilution PCE from 5g WT pollen grains (40 mg mL <sup>-1</sup> )                |
| 3/20 WT           | 3/20 dilution PCE from 5g WT pollen grains (30 mg mL <sup>-1</sup> )               |
| 1/10 WT           | 1/10 dilution PCE from 5g WT pollen grains (20 mg mL <sup>-1</sup> )               |
| 1/20 WT           | 1/20 dilution PCE from 5g WT pollen grains (10 mg mL <sup>-1</sup> )               |
| 1/4 E157          | 1/4 dilution PCE from 5g <i>E157</i> pollen grains (25 mg mL <sup>-1</sup> )       |
| 1/5 E157          | 1/5 dilution PCE from 5g <i>E157</i> pollen grains (20 mg mL <sup>-1</sup> )       |
| 3/20 E157         | 3/20 dilution PCE from 5g <i>E157</i> pollen grains (15 mg mL <sup>-1</sup> )      |
| 1/10 E157         | 1/10 dilution PCE from 5g <i>E157</i> pollen grains (10 mg mL <sup>-1</sup> )      |
| 1/20 E157         | 1/20 dilution PCE from 5g <i>E157</i> pollen grains (5 mg mL <sup>-1</sup> )       |
| FA fraction       | fatty acid fractions from WT PCE (20 mg mL <sup>-1</sup> )                         |
| DS fraction       | dehydrated sterol fractions from WT PCE (20 mg mL <sup>-1</sup> )                  |
| TE fraction       | triterpene ester fractions from WT PCE (20 mg mL <sup>-1</sup> )                   |
| 16:0+18:0+18:3    | 16:0 18:0 and 18:3 with ratio of 23:19:49 (20 mg mL <sup>-1†</sup> )               |
| 16:0+18:3         | 16:0 and 18:3 with ratio of 23:49 (20 mg mL <sup>-1†</sup> )                       |
| 18:0+18:3         | 18:0 and 18:3 with ratio of 19:49 (20 mg mL <sup>-1†</sup> )                       |
| 16:0+18:0         | 16:0 and 18:0 with ratio of 23:19 (20 mg mL <sup>-1†</sup> )                       |
| 16:0              | palmitic acid (20 mg mL <sup>-1</sup> )                                            |
| 18:3              | linolenic acid (20 mg mL <sup>-1</sup> )                                           |
| 18:0              | stearic acid (20 mg mL <sup>-1</sup> )                                             |

181 \* All the fractions and chemicals were dissolved in hexane. † represents total  
 182 concentration.  
 183
