# Supplementary material for: Deficiency of a triterpene pathway results in humidity-sensitive genic male sterility in rice
Source: PubMed Central journal article supplement (PMC5807508; doi:10.1038/s41467-018-03048-8), 2018-02-09
Supplement: 41467_2018_3048_MOESM5_ESM.pdf [file 41467_2018_3048_MOESM5_ESM.pdf]

Physicochemical data of polypoda-7,13*E*,17*E*,21-tetraene-3-beta-ol

S1. Infrared spectroscopy.

S2. UV spectroscopy (dissolved in CH<sub>3</sub>OH).

## S1. IR spectroscopy

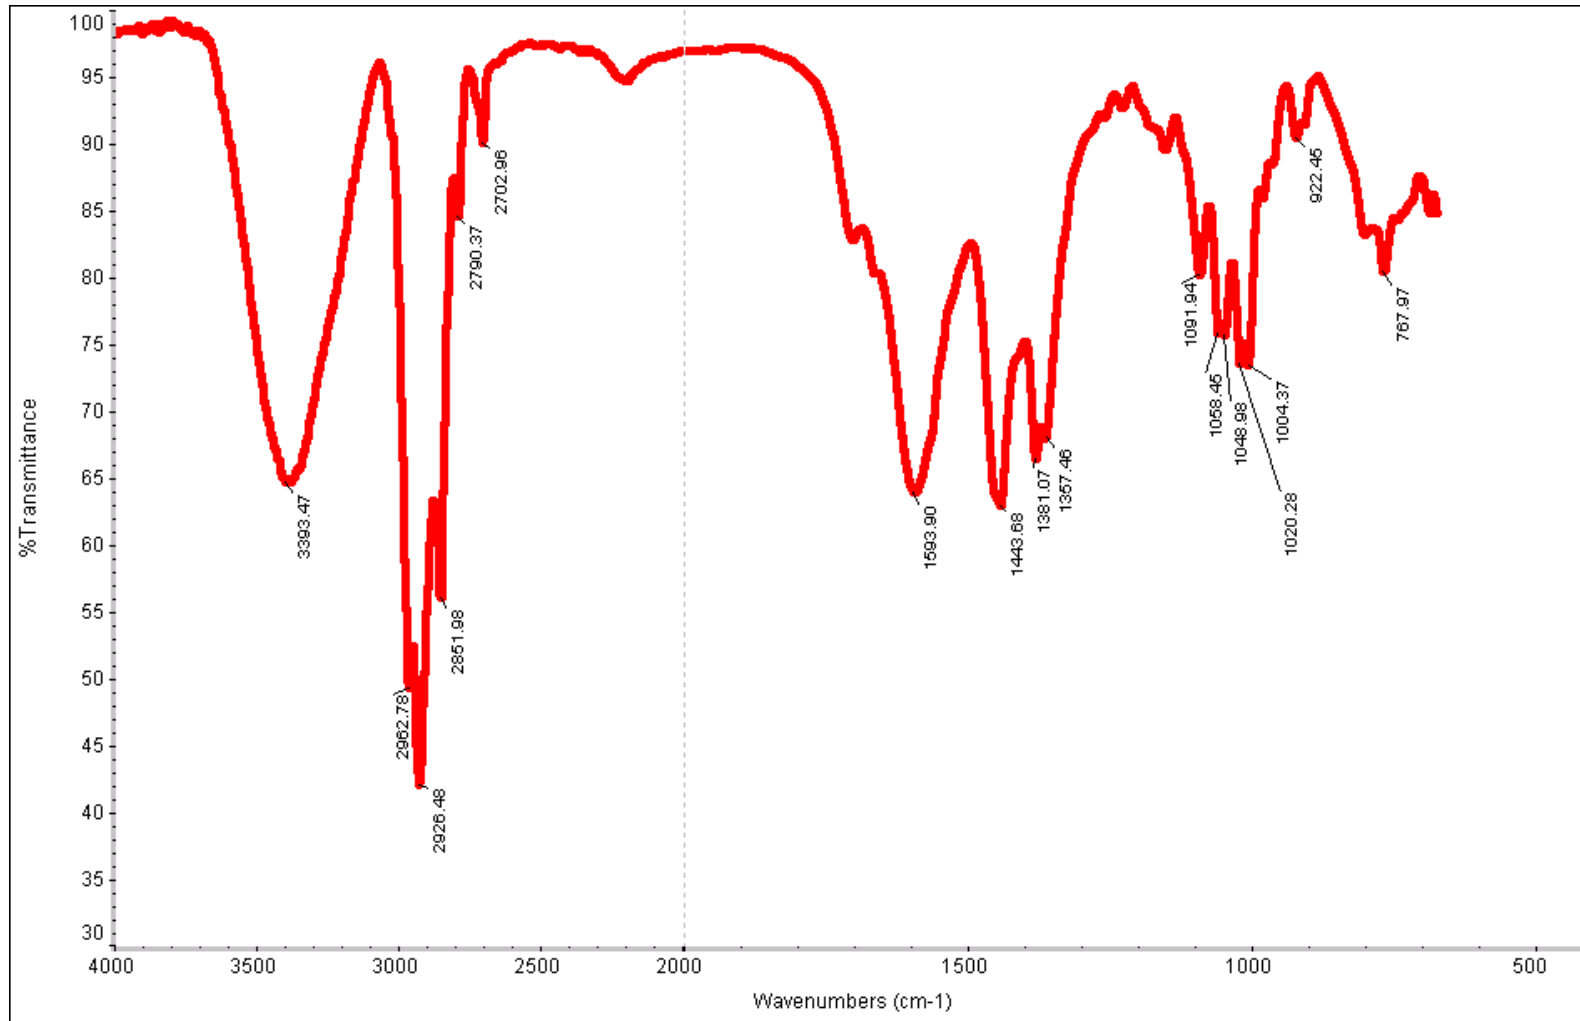

S2. UV spectroscopy (dissolved in CH<sub>3</sub>OH).

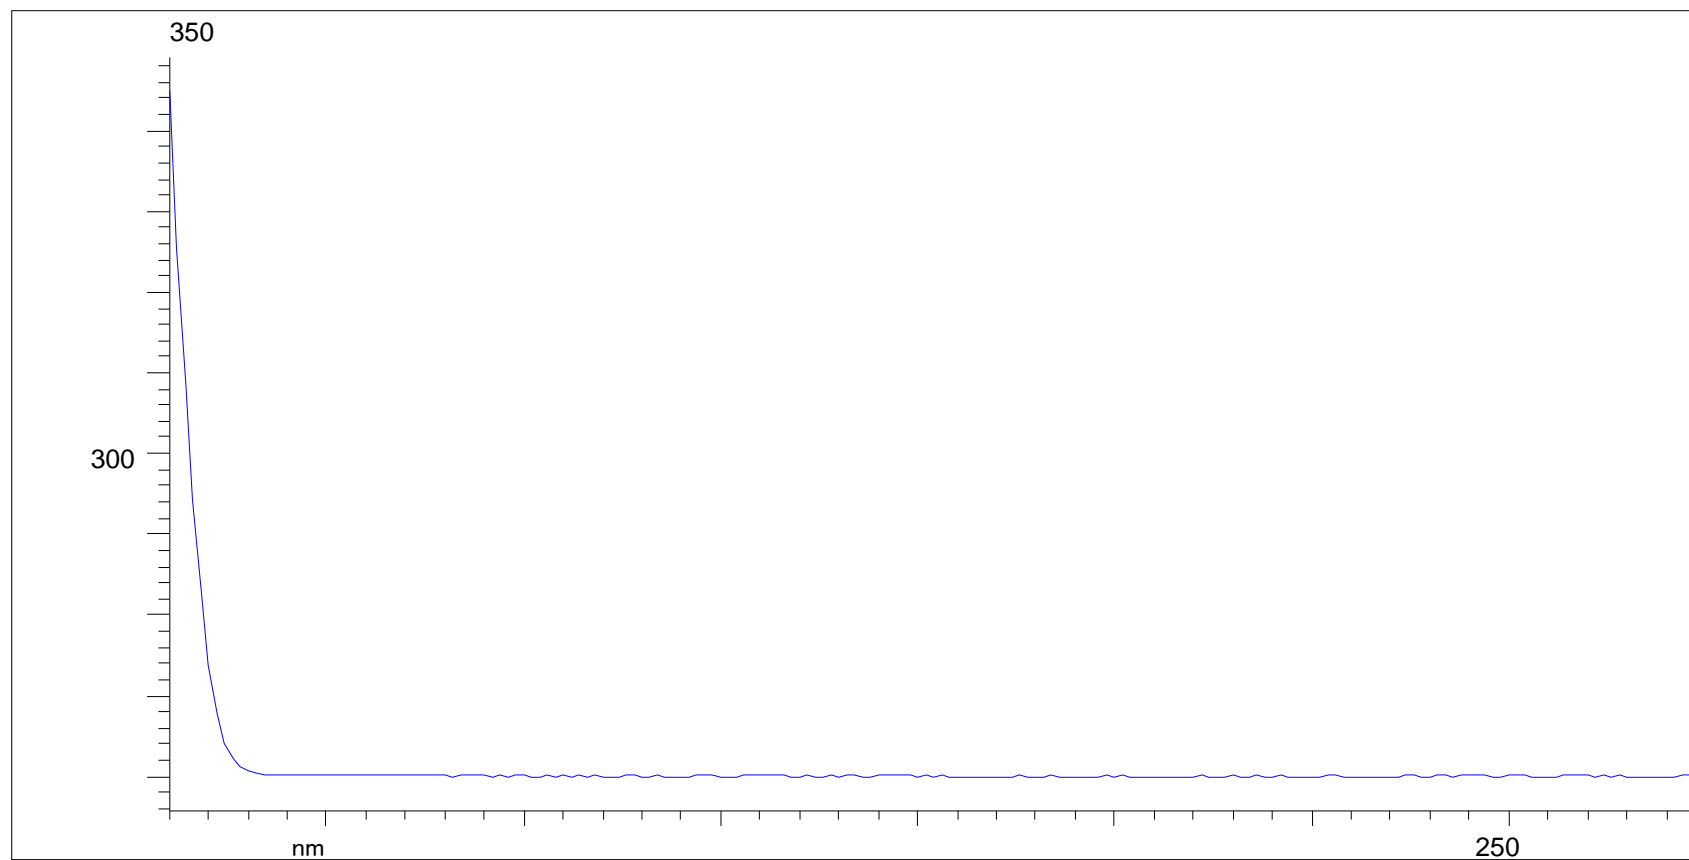

Wavelength (nm)
